# Supplementary material
Source: PubMed Central journal article supplement (PMC6812538)
Supplement: NIHMS1054531-supplement-1.pdf [file NIHMS1054531-supplement-1.pdf]

**Supplementary material 1A:** Myopathy genes included in the initial next generation sequencing panel.

*ACTA1, ANO5, ATP2A1, B3GNT1, B3GALNT2, BAG3, BICD2, BIN1, CACNA1S, CAPN3, CAV3, CFL2, CHKB, CLCN1, CNTN1, COL6A1, COL6A2, COL6A3, CRYAB, DAG1, DES, DMD, DNAJB6, DNMT2, DPM1, DPM2, DPM3, DYSF, EMD, FHL1, FKRP, FKTN, FLNC, GAA, GMPPB, GNE, ISPD, ITGA7, KBTBD13, KLHL40, LAMA2, LAMP2, LARGE, LDB3, LMNA, MEGF10, MTM1, MYH7, MYOT, NEB, PHKA1, PLEC, POMGNT1, POMT1, POMT2, PYGM, RYR1, SCN4A, SEPNI, SGCA, SGCB, SGCD, SGCG, SIL1, SYNE1, TCAP, TMEM5, TTN, TNNT2, TNNT1, TNPO3, TPM2, TPM3, and TRIM32*

**Supplementary material 1B:** Additional next generation sequencing panel obtained mainly to search for deleterious variants in genes known to cause myopathy with rimmed vacuoles.

*AAAS, AARS, ABCA1, ABCD1, ACTA1, ADCY6, AIFM1, AMACR, ANO5, AP1S1, AP4B1, AP4E1, AP4M1, AP4S1, AP5Z1, APOA1, APTX, ARHGEF10, ARSA, ATLI, ATM, ATP7A, B2M, B4GALNT1, BAG3, BCKDHB, BICD2, BIN1, BSCL2, C12orf65, CAV3, CCT5, CLCF1, CNTNAP1, COX10, CPOX, CRLF1, CRYAB, CTDP1, CTSA, CYP27A1, CYP2UI, CYP7B1, DARS2, DCAF8, DCTN1, DDHD1, DDHD2, DES, DGUOK, DHH, DHTKD1, DNAJB2, DNAJB6, DNMT2, DNMT1, DST, DYNC1H1, DYSF, EGR2, ERBB3, ERCC6, ERCC8, ERLIN2, FA2H, FAH, FAM126A, FAM134B, FBLN5, FBXO38, FGD4, FGF14, FHL1, FIG4, FLNC, FLVCR1, FMRI, GALC, GAN, GARS, GBA2, GBE1, GDAP1, GJB1, GJB3, GJC2, GLA, GNB4, GNE, GSN, HADHA, HADHB, HARS, HINT1, HK1, HMBS, HNRNPA1, HNRNPA2B1, HSPB1, HSPB3, HSPB8, HSPD1, IGHMBP2, IKBKAP, INF2, KARS, KIF1A, KIF1B, KIF5A, LICAM, LAMA2, LDB3, LITAF, LMNA, LRSAM1, LYST, MAF, MARS, MATR3, MED25, MFN2, MMACHC, MPV17, MPZ, MTMR2, MTPP, MYH14, MYH2, MYH7, MYOT, NAGA, NAGLU, NDRG1, NEB, NEFL, NF2, NGF, NIPA1, NTRK1, OAT, OPA1, PANK2, PDHA1, PDK3, PDYN, PEX10, PEX7, PHYH, PLA2G6, PLEKHG5, PLOD1, PLP1, PMM2, PMP2, PMP22, PNKP, PNPLA6, POLG, PPOX, PRNP, PRPS1, PRX, RAB7A, REEP1, RRM2B, RTN2, SACS, SBF1, SBF2, SCN10A, SCN11A, SCN9A, SCO2, SCP2, SELENON, SETX, SH3TC2, SLC12A6, SLC16A2, SLC25A19, SLC25A46, SLC33A1, SLC52A2, SLC5A7, SNAP29, SOD1, SOX10, SPAST, SPG11, SPG20, SPG21, SPG7, SPTLC1, SPTLC2, SQSTM1, SURF1, TDPI, TECPR2, TFG, TIA1, TRIM2, TRPA1, TRPV4, TTN, TTPA, TTR, TUBB3, TWNK, TYMP, VCP, VPS37A, WASHC5, WNK1, XPA, XPC, YARS, and ZFYVE26*
